# Supplementary material
Source: PubMed Central journal article supplement (PMC2727217)
Supplement: kwn403_1.pdf [file kwn403_1.pdf]

**Web Table 1.** Cox proportional hazards ratios demonstrating the association of cumulative life course socioeconomic position (SEP) score with incident cardiovascular disease. Framingham Offspring Study, United States (1971-2003).

| Cumulative SEP Score <sup>†</sup> | N   | No. of events | Model Adjustment  |                             |
|-----------------------------------|-----|---------------|-------------------|-----------------------------|
|                                   |     |               | Age, Sex          | Age, Sex, CHD Risk Factors* |
|                                   |     |               | HR (95% CI)       | HR (95% CI)                 |
| 0 or 1                            | 573 | 99            | 1.62 (1.15, 2.29) | 1.11 (0.77, 1.60)           |
| 2 or 3                            | 648 | 73            | 1.45 (1.01, 2.07) | 1.20 (0.83, 1.73)           |
| 4-6                               | 616 | 51            | 1.00              | 1.00                        |

\* CHD (coronary heart disease) risk factors include smoking, body mass index, systolic blood pressure, total:HDL cholesterol ratio, fasting glucose, and antihypertensive medications.

<sup>†</sup>Analyses used a cumulative SEP score including father's education, own education and own occupation. Scores were calculated for each SEP measure separately, and then summed (range 0-6): Father's education <high school=0, high school=1, >high school =2. Own education: ≤12 years=0, 13-16 years=1, ≥17 years=2. Own occupation: laborer=0, clerical/sales/homemaker=1, executive/professional/supervisory/technical=2.

**Web Table 2.** Cox proportional hazards ratios for the association of life course socioeconomic position (SEP) with incidence of cardiovascular disease. Framingham Offspring Study, United States (1971-2003).

| SEP Measure        | SEP Level                                         | No. Events | Model Adjustment  |                               |                                         |
|--------------------|---------------------------------------------------|------------|-------------------|-------------------------------|-----------------------------------------|
|                    |                                                   |            | Age, sex          | Age, sex, other SEP measures* | Age, sex, CHD risk factors <sup>†</sup> |
|                    |                                                   |            | HR (95% CI)       | HR (95% CI)                   | HR (95% CI)                             |
| Father's Education | <High School                                      |            | 1.41 (0.98, 2.03) | 1.27 (0.86, 1.89)             | 1.07 (0.73, 1.57)                       |
|                    | High School                                       | 42         | 1.47 (0.94, 2.28) | 1.40 (0.89, 2.19)             | 1.27 (0.81, 2.00)                       |
|                    | >High School                                      | 37         | 1.00              | 1.00                          | 1.00                                    |
| Own Education      | ≤12 years                                         | 110        | 1.69 (1.08, 2.63) | 1.48 (0.89, 2.46)             | 1.06 (0.66, 1.69)                       |
|                    | 13-16 years                                       | 88         | 1.58 (1.01, 2.48) | 1.53 (0.96, 2.43)             | 1.15 (0.72, 1.84)                       |
|                    | >16 years                                         | 25         | 1.00              | 1.00                          | 1.00                                    |
| Own Occupation     | Laborer                                           | 77         | 1.29 (0.93, 1.77) | 1.12 (0.77, 1.63)             | 0.96 (0.69, 1.35)                       |
|                    | Homemaker, Clerical or Sales                      | 72         | 1.02 (0.70, 1.48) | 0.94 (0.64, 1.39)             | 0.91 (0.61, 1.34)                       |
|                    | Professional, Executive, Supervisory or Technical | 74         | 1.00              | 1.00                          | 1.00                                    |

\*"Other SEP measures" refers to adjustment for measures of SEP other than the exposure of interest. For example analyses on father's education are adjusted for own education and own occupation.

<sup>†</sup>CHD (coronary heart disease) risk factors include smoking, body mass index, systolic blood pressure, total:HDL cholesterol ratio, fasting glucose, and antihypertensive medications.

**Web Table 3.** Sensitivity analyses in participants aged  $\geq 40$  years (rather than  $\geq 28$  years), showing Cox proportional hazards ratios for the association of occupation with incidence of coronary heart disease and cardiovascular disease. Framingham Offspring Study, United States (1971-2003).

| SEP Level                                            | N   | No. Events | Model Adjustment        |                                                |                                                           |
|------------------------------------------------------|-----|------------|-------------------------|------------------------------------------------|-----------------------------------------------------------|
|                                                      |     |            | Age, sex<br>HR (95% CI) | Age, sex, other<br>SEP measures<br>HR (95% CI) | Age, sex, CHD<br>risk factors <sup>†</sup><br>HR (95% CI) |
| <b>Coronary Heart Disease</b>                        |     |            |                         |                                                |                                                           |
| Laborer                                              | 279 | 45         | 1.26 (0.82, 1.93)       | 1.06 (0.65, 1.75)                              | 0.90 (0.57, 1.41)                                         |
| Homemaker, Clerical or<br>Sales                      | 482 | 41         | 1.14 (0.68, 1.89)       | 1.04 (0.62, 1.74)                              | 0.99 (0.59, 1.68)                                         |
| Professional, Executive,<br>Supervisory or Technical | 344 | 39         | 1.00                    | 1.00                                           | 1.00                                                      |
| <b>Cardiovascular Disease</b>                        |     |            |                         |                                                |                                                           |
| Laborer                                              | 279 | 68         | 1.27 (0.90, 1.81)       | 1.12 (0.74, 1.68)                              | 0.88 (0.61, 1.27)                                         |
| Homemaker, Clerical<br>or Sales                      | 483 | 61         | 0.98 (0.65, 1.48)       | 0.91 (0.60, 1.40)                              | 0.88 (0.57, 1.35)                                         |
| Professional, Executive,<br>Supervisory or Technical | 345 | 59         | 1.00                    | 1.00                                           | 1.00                                                      |

\*"Other SEP measures" refers to adjustment for father's education and own education.

<sup>†</sup>CHD (coronary heart disease) risk factors include smoking, body mass index, systolic blood pressure, total:HDL cholesterol ratio, fasting glucose, and antihypertensive medications.
